# Supplementary material for: A Novel Proteomics-Based Clinical Diagnostics Technology Identifies Heterogeneity in Activated Signaling Pathways in Gastric Cancers
Source: PLoS One. 2013 Jan 25;8(1):e54644. doi: 10.1371/journal.pone.0054644 (PMC3556044; doi:10.1371/journal.pone.0054644)
Supplement: Table S1 — HER2 & p95HER2 expression and biomarker phosphorylations in HER2(+) and HER2(−) GCs. This table shows the HER2 gene amplification status (‘1’ is gene amplified and ‘0’ is not gene amplified) and HER2 IHC scores (represented as ‘0’, ‘1’, ‘2’ or ‘3’) of HER2(+) and HER2(−) gastric cancer samples both based on gastric cancer (GCA) and breast cancer (BCA) scoring criteria. The histological subtypes of the gastric cancer samples are represented by color coding: intestinal type (yellow), diffuse type (blue), mixed type (pink), and not determined (white). The table also summarizes the p95HER2 expression status (‘1’ is p95(+), ‘0’ is p95(−), ND is not determined) and the phosphorylation status (‘1’ is phosphorylated and ‘0’ is not phosphorylated) of HER1, HER2, HER3, c-MET, IGF1R and PI3K signaling molecules in each sample. Respective CU cut-offs for each marker are indicated at the top of the respective columns. (XLSX) [file pone.0054644.s005.xlsx]

## Sheet: Suppl Table 1-GCA Phospho
SUPPLEMENTARY TABLE 1: HER2 & p95HER2 EXPRESSION AND BIOMARKER PHOSPHORYLATIONS IN HER2(+) & HER2(-) GCs
	HER2 & p95HER2 Expression and Marker Phosphorylations in HER2(+) GCAs (Total no. of samples = 50)											HER2 & p95HER2 Expression and Marker Phosphorylations in HER2(-) GCAs (Total no. of samples = 384)
	HER2 IHC Score (GCA criteria)	HER2 Gene Amplification	HER2 IHC Score (BCA criteria)	p95HER2 (cutoff: >=500 CU)	p-HER1 (cut-off:>=6.7 CU)	p-HER2 (cut-off:>=41.6 CU)	p-HER3 (cut-off:>=1124.3 CU)	p-cMET (cut-off:>=6.1 CU)	p-IGF1R (cut-off:>=69.2 CU)	p-PI3K (cut-off:>=175.3 CU)		HER2 IHC Score (GCA criteria)	HER2 Gene Amplification	HER2 IHC Score (BCA criteria)	p95HER2 (cutoff: >=500 CU)	p-HER1 (cut-off:>=6.7 CU)	p-HER2 (cut-off:>=41.6 CU)	p-HER3 (cut-off:>=1124.3 CU)	p-cMET (cut-off:>=6.1 CU)	p-IGF1R (cut-off:>=69.2 CU)	p-PI3K (cut-off:>=175.3 CU)
	3	1	3	1	1	1	1	1	0	1		2	0	1	ND	1	1	1	0	1	1
	3	1	3	1	1	1	1	1	0	1		2	0	1	ND	1	1	1	0	0	1
	3	1	3	1	0	1	0	0	1	1		2	0	1	ND	1	1	1	0	0	0
	3	1	3	1	0	1	1	0	1	1		2	0	2	ND	1	1	1	0	1	0
	3	1	3	1	0	1	0	0	0	1		2	0	1	ND	1	1	1	1	1	1
	3	1	3	1	0	1	1	0	1	1		2	0	2	ND	0	0	0	0	0	0
	3	1	3	1	0	1	0	0	0	0		2	0	2	ND	0	0	0	0	0	0
	3	1	3	0	0	1	0	0	0	0		2	0	2	ND	0	0	0	0	0	0
	3	1	3	1	0	1	0	0	1	1		2	0	1	ND	0	0	0	1	0	0
	3	1	3	1	1	1	0	1	0	1		2	0	1	ND	0	0	0	0	0	0
	3	1	3	1	0	1	1	0	0	0		2	0	2	ND	0	0	0	0	0	0
	3	1	3	1	0	1	0	1	0	0		2	0	1	ND	0	0	0	0	0	0
	3	1	3	1	0	1	0	1	0	0		2	0	2	ND	0	0	0	0	0	0
	3	1	3	1	0	1	1	0	0	0		2	0	1	ND	0	0	1	0	0	1
	3	1	3	0	0	1	1	0	0	1		2	0	2	ND	0	0	0	0	1	0
	3	1	3	0	0	1	1	0	1	0		2	0	1	ND	0	0	0	0	0	0
	3	1	3	1	0	1	0	0	0	0		2	0	2	ND	0	0	0	1	0	0
	3	1	3	1	0	1	0	0	0	0		2	0	1	0	0	0	0	0	1	0
	3	1	3	1	1	0	0	0	0	0		2	0	1	ND	0	0	1	0	0	1
	3	1	2	0	0	0	0	0	0	0		2	0	1	ND	1	0	0	1	0	0
	3	1	3	1	0	0	1	0	0	0		2	0	1	ND	0	1	0	1	0	0
	3	1	3	1	0	0	0	0	0	0		2	0	1	ND	0	0	0	0	0	0
	3	1	2	0	0	0	0	0	0	0		2	0	1	ND	0	0	0	0	0	0
	3	1	3	1	0	0	0	0	0	0		2	0	1	ND	0	0	0	0	0	0
	3	1	2	1	0	0	0	0	1	0		2	0	2	0	1	0	0	1	0	0
	3	1	3	1	0	0	1	0	1	1		2	0	2	ND	0	0	0	0	0	0
	3	1	3	0	1	0	1	0	1	1		2	0	1	ND	0	0	0	0	1	0
	3	1	3	1	0	0	0	0	0	0		2	0	2	ND	0	0	0	0	0	0
	3	1	3	1	0	0	0	0	0	0		1	0	1	ND	1	1	1	1	1	1
	3	1	3	0	0	0	0	0	0	0		1	0	1	ND	1	1	0	1	1	1
	2	1	1	ND	1	1	1	1	1	1		1	0	1	ND	1	1	1	0	1	1
	2	1	2	1	1	1	1	0	1	1		1	0	1	ND	1	1	0	0	0	0
	2	1	2	ND	1	1	0	1	0	0		1	0	1	ND	1	1	1	1	0	0
	2	1	1	ND	1	1	1	1	1	1		1	0	1	0	1	1	1	0	1	1
	2	1	1	ND	0	1	1	0	1	1		1	0	1	ND	1	1	1	0	0	0
	2	1	2	ND	0	1	0	0	0	0		1	0	1	ND	1	1	1	1	1	1
	2	1	2	ND	1	1	1	0	0	0		1	0	1	ND	1	1	1	1	1	1
	2	1	1	ND	1	0	1	0	1	1		1	0	1	ND	1	1	1	1	1	1
	2	1	1	ND	0	0	0	0	0	0		1	0	1	ND	1	1	1	1	1	1
	2	1	2	ND	0	0	0	0	0	0		1	0	1	ND	1	1	1	1	1	1
	2	1	1	ND	0	0	1	0	1	0		1	0	1	ND	1	1	1	1	1	1
	2	1	1	ND	0	0	0	0	0	0		1	0	1	1	1	1	1	0	1	1
	2	1	1	ND	0	0	0	1	0	0		1	0	1	ND	1	1	1	1	1	1
	2	1	2	ND	0	0	0	1	0	0		1	0	1	ND	0	1	0	0	0	0
	2	1	1	ND	0	0	0	0	1	0		1	0	1	ND	1	1	1	1	1	1
	2	1	1	ND	1	0	0	0	0	0		1	0	1	ND	0	1	1	0	0	0
	2	1	1	ND	0	0	0	0	0	0		1	0	1	ND	1	1	0	0	0	0
	2	1	2	ND	1	0	0	1	0	0		1	0	1	ND	0	1	1	0	1	1
	2	1	2	ND	0	0	0	0	0	0		1	0	1	0	0	1	0	1	0	0
	2	1	2	ND	0	0	0	0	0	0		1	0	1	ND	0	1	1	0	1	1
												1	0	1	ND	1	1	1	1	1	1
	Notes:											1	0	1	ND	0	1	0	0	0	0
	"0", "1", "2" and "3" refer to HER2 IHC scores in columns "HER2 IHC Score" as determined by GCA or BCA criteria											1	0	1	0	1	1	0	0	0	0
	In other columns, "1" denotes expressed or phosphorylated or gene amplified											1	0	1	ND	1	1	1	1	1	1
	"0" denotes not expressed or not phosphorylated or not gene amplified											1	0	1	ND	0	1	0	0	0	0
	All Phospho-expressions are in Computed Units (C.U.)											1	0	1	ND	0	1	1	0	0	0
	Color coding represents the various GCA histotypes: yellow=intestinal, blue=diffuse, pink=mixed, white=not defined											1	0	1	ND	1	1	0	1	1	1
	"ND" referes to not determined											1	0	1	ND	1	1	0	1	0	0
												1	0	1	1	1	0	1	0	1	1
												1	0	1	ND	1	0	0	1	1	1
												1	0	1	ND	1	0	0	1	1	1
												1	0	1	ND	1	0	1	1	0	0
												1	0	1	ND	0	0	0	0	0	0
												1	0	1	ND	0	0	0	0	0	0
												1	0	1	ND	0	0	0	0	0	1
												1	0	1	ND	0	0	0	0	0	1
												1	0	1	ND	0	0	0	0	0	0
												1	0	1	ND	0	0	0	0	0	0
												1	0	1	ND	0	0	0	0	0	0
												1	0	1	ND	0	0	0	0	1	1
												1	0	1	ND	0	1	0	1	1	0
												1	0	1	ND	0	0	0	1	0	0
												1	0	1	ND	0	0	0	0	0	0
												1	0	1	ND	0	0	0	0	0	0
												1	0	1	ND	0	0	1	1	1	1
												1	0	1	ND	0	0	0	1	1	1
												1	0	1	ND	0	0	0	0	1	0
												1	0	1	ND	1	1	0	1	1	0
												1	0	1	ND	0	0	0	0	0	0
												1	0	1	ND	0	0	0	0	0	0
												1	0	1	0	0	0	0	0	0	0
												1	0	1	ND	1	0	0	1	0	0
												1	0	1	ND	0	0	0	0	0	0
												1	0	1	ND	0	0	1	0	0	0
												1	0	1	1	1	1	1	0	0	0
												1	0	1	ND	0	0	0	0	0	0
												1	0	1	1	0	0	0	0	0	0
												1	0	1	ND	0	0	0	0	0	0
												1	0	1	ND	0	0	0	0	0	0
												1	0	1	ND	0	0	0	1	0	0
												1	0	1	ND	0	0	0	1	0	0
												1	0	1	ND	0	0	0	0	0	0
												1	0	1	ND	0	0	0	0	0	0
												1	0	1	ND	0	0	1	0	0	0
												1	0	1	ND	0	0	0	0	0	0
												1	0	1	ND	0	0	0	1	0	0
												1	0	1	ND	0	1	1	0	1	1
												1	0	1	ND	0	0	0	1	0	0
												1	0	1	ND	0	0	0	1	0	0
												1	0	1	ND	0	0	0	0	1	0
												1	0	1	ND	0	0	0	0	0	0
												1	0	1	ND	0	0	0	0	0	0
												1	0	1	ND	0	0	0	0	0	0
												1	0	1	ND	0	0	0	0	0	0
												1	0	1	ND	1	0	1	1	1	1
												1	0	1	ND	0	0	0	0	1	1
												1	0	1	ND	0	0	0	0	0	0
												1	0	1	ND	0	0	0	0	0	0
												1	0	1	ND	0	0	0	0	0	0
												1	0	1	ND	0	0	0	0	0	0
												1	0	1	ND	1	0	0	1	1	0
												1	0	1	ND	0	0	0	0	0	0
												1	0	1	ND	0	0	0	0	0	0
												1	0	1	ND	0	0	0	0	0	0
												1	0	1	ND	0	0	0	0	0	0
												1	0	1	ND	0	0	0	0	1	0
												1	0	1	ND	0	0	0	0	0	0
												1	0	1	ND	0	0	0	0	0	0
												1	0	1	ND	0	0	0	0	0	0
												1	0	1	ND	0	0	0	0	0	0
												1	0	1	ND	0	0	0	1	0	0
												1	0	1	ND	0	0	0	1	0	0
												1	0	1	ND	1	1	1	1	1	1
												1	0	1	ND	0	0	0	0	0	0
												1	0	1	ND	0	0	0	0	0	0
												1	0	1	ND	0	0	0	0	0	0
												1	0	1	ND	1	0	1	1	0	1
												1	0	1	ND	0	0	0	0	0	0
												1	0	1	ND	0	0	0	0	0	0
												1	0	1	ND	0	0	0	0	0	0
												1	0	1	ND	0	0	0	1	0	0
												1	0	1	ND	0	0	0	0	0	0
												1	0	1	ND	0	0	0	0	0	0
												1	0	1	0	0	0	0	0	0	0
												1	0	1	ND	0	0	0	0	0	0
												1	0	1	ND	0	0	0	0	0	0
												1	0	1	ND	0	1	1	0	0	1
												1	0	1	ND	0	0	0	0	0	0
												1	0	1	ND	1	0	0	1	1	1
												1	0	1	ND	0	0	0	1	0	0
												1	0	1	ND	0	1	0	0	1	1
												1	0	1	ND	1	0	0	1	0	0
												1	0	1	ND	0	0	0	0	0	0
												1	0	1	ND	0	0	0	1	0	0
												1	0	1	ND	0	0	0	0	0	0
												1	0	1	ND	1	0	0	0	0	0
												1	0	1	ND	0	0	0	0	1	0
												1	0	1	ND	0	0	0	0	0	0
												1	0	1	ND	0	0	0	0	0	0
												1	0	1	ND	0	0	0	0	0	0
												1	0	1	ND	0	0	0	0	0	0
												1	0	1	ND	0	0	0	0	0	1
												1	0	1	ND	0	0	0	0	1	1
												1	0	1	ND	0	0	0	0	0	0
												1	0	1	ND	0	0	0	0	0	0
												1	0	1	ND	1	0	0	0	1	0
												1	0	1	ND	0	0	0	0	0	0
												1	0	1	ND	0	0	1	0	1	1
												1	0	1	ND	0	0	0	0	0	0
												1	0	1	0	0	0	0	0	0	0
												1	0	1	ND	0	0	0	0	1	0
												1	0	1	ND	0	0	0	0	0	0
												0	0	0	ND	1	1	1	0	0	0
												0	0	0	ND	1	1	1	1	0	1
												0	0	0	ND	1	1	1	1	1	1
												0	0	0	ND	1	1	1	1	1	1
												0	0	0	0	1	1	0	0	0	0
												0	0	0	1	1	1	1	0	0	0
												0	0	0	ND	1	1	1	1	1	1
												0	0	0	0	1	1	1	1	1	1
												0	0	0	ND	1	1	1	0	0	1
												0	0	0	ND	1	1	1	1	1	1
												0	0	0	ND	1	1	1	1	1	1
												0	0	0	ND	1	1	1	1	0	0
												0	0	0	ND	1	1	1	1	1	1
												0	0	0	ND	1	1	1	0	1	1
												0	0	0	1	1	1	1	1	1	1
												0	0	0	ND	0	1	1	0	1	0
												0	0	0	ND	1	1	1	0	0	1
												0	0	0	ND	1	1	1	1	1	0
												0	0	0	ND	0	1	1	0	0	1
												0	0	0	ND	1	1	1	1	1	1
												0	0	0	ND	0	1	0	0	0	1
												0	0	0	ND	0	1	1	0	1	0
												0	0	0	ND	0	1	1	0	0	0
												0	0	0	ND	0	1	0	0	0	0
												0	0	0	0	1	1	0	0	0	0
												0	0	0	0	0	1	0	0	0	0
												0	0	0	ND	0	1	0	0	0	0
												0	0	0	NOT ANALYZABLE	1	1	1	1	1	0
												0	0	0	ND	1	1	0	0	1	1
												0	0	0	ND	0	1	0	0	0	0
												0	0	0	ND	0	1	1	0	0	0
												0	0	0	ND	0	1	0	0	0	0
												0	0	0	ND	1	1	1	0	0	1
												0	0	0	ND	1	1	0	0	1	1
												0	0	0	ND	1	0	0	1	1	0
												0	0	0	ND	1	0	1	1	1	1
												0	0	0	ND	1	0	0	1	1	1
												0	0	0	ND	1	0	0	0	1	1
												0	0	0	ND	1	1	0	0	0	0
												0	0	0	0	1	0	1	1	1	1
												0	0	0	ND	1	0	0	1	0	0
												0	0	0	1	1	1	1	0	1	1
												0	0	0	ND	1	0	0	0	0	0
												0	0	0	ND	1	0	0	1	0	0
												0	0	0	ND	1	0	0	0	0	0
												0	0	0	ND	1	0	1	1	1	1
												0	0	0	ND	0	0	0	1	0	0
												0	0	0	ND	0	0	0	1	0	0
												0	0	0	ND	0	0	0	1	0	0
												0	0	0	ND	0	0	0	0	0	0
												0	0	0	ND	0	0	0	0	0	0
												0	0	0	ND	0	0	0	0	0	0
												0	0	0	ND	0	0	0	0	0	0
												0	0	0	ND	0	0	0	0	0	0
												0	0	0	ND	0	0	0	0	0	1
												0	0	0	ND	0	0	0	0	0	0
												0	0	0	ND	0	0	0	0	0	0
												0	0	0	ND	1	0	0	1	0	0
												0	0	0	ND	0	0	1	0	0	0
												0	0	0	ND	0	1	0	1	1	0
												0	0	0	ND	0	0	0	0	0	0
												0	0	0	ND	1	0	0	1	0	0
												0	0	0	ND	0	0	0	0	0	0
												0	0	0	ND	0	0	0	0	0	0
												0	0	0	ND	0	0	0	1	0	0
												0	0	0	ND	0	0	0	0	0	0
												0	0	0	ND	0	0	0	0	0	0
												0	0	0	1	0	0	1	0	0	0
												0	0	0	ND	0	0	0	0	0	0
												0	0	0	ND	0	0	0	0	0	0
												0	0	0	ND	0	0	0	0	0	0
												0	0	0	ND	0	0	0	0	0	0
												0	0	0	ND	0	0	0	1	0	0
												0	0	0	ND	1	0	1	0	1	1
												0	0	0	ND	0	0	0	0	0	0
												0	0	0	ND	1	0	0	1	0	0
												0	0	0	ND	0	0	0	0	0	0
												0	0	0	ND	0	0	0	1	0	0
												0	0	0	ND	0	0	0	0	0	0
												0	0	0	ND	0	0	0	0	1	0
												0	0	0	ND	0	0	0	0	1	0
												0	0	0	ND	0	0	0	0	1	0
												0	0	0	ND	0	0	0	0	1	1
												0	0	0	ND	0	0	0	0	0	0
												0	0	0	ND	0	0	1	0	0	0
												0	0	0	ND	0	0	0	0	0	0
												0	0	0	ND	0	0	0	0	0	0
												0	0	0	ND	0	0	0	0	0	0
												0	0	0	ND	0	0	0	0	0	0
												0	0	0	ND	0	0	0	0	0	0
												0	0	0	ND	0	0	0	0	0	0
												0	0	0	ND	0	0	0	0	0	0
												0	0	0	ND	1	0	1	0	0	0
												0	0	0	ND	1	0	0	0	0	0
												0	0	0	ND	0	0	0	0	1	0
												0	0	0	ND	0	0	1	0	0	0
												0	0	0	ND	0	0	0	0	0	0
												0	0	0	ND	0	0	0	0	0	0
												0	0	0	ND	0	0	0	0	0	0
												0	0	0	ND	0	0	0	0	0	0
												0	0	0	ND	0	0	0	1	0	0
												0	0	0	ND	0	0	0	0	0	0
												0	0	0	ND	0	0	0	0	0	0
												0	0	0	ND	0	0	0	0	0	0
												0	0	0	ND	0	0	0	1	1	1
												0	0	0	ND	0	0	0	0	0	1
												0	0	0	ND	0	0	0	1	1	0
												0	0	0	ND	0	0	1	0	0	0
												0	0	0	ND	0	0	0	0	0	0
												0	0	0	ND	0	0	0	0	1	1
												0	0	0	ND	0	0	0	0	0	0
												0	0	0	ND	0	0	0	0	0	0
												0	0	0	ND	0	0	0	0	0	0
												0	0	0	ND	0	0	0	0	0	0
												0	0	0	ND	1	0	0	1	1	0
												0	0	0	ND	0	0	0	0	0	0
												0	0	0	ND	0	0	0	0	0	0
												0	0	0	ND	1	0	0	1	0	0
												0	0	0	ND	0	0	0	0	0	0
												0	0	0	ND	0	0	0	0	0	0
												0	0	0	ND	0	0	0	1	0	0
												0	0	0	ND	0	0	0	0	0	0
												0	0	0	ND	0	0	0	0	0	0
												0	0	0	ND	0	0	0	0	0	0
												0	0	0	ND	0	0	0	0	0	1
												0	0	0	ND	0	0	0	0	0	0
												0	0	0	ND	1	0	0	1	1	1
												0	0	0	ND	0	0	1	1	0	0
												0	0	0	ND	0	0	0	0	0	0
												0	0	0	ND	0	0	0	0	0	0
												0	0	0	ND	0	0	0	0	0	0
												0	0	0	ND	0	0	0	0	1	0
												0	0	0	ND	0	0	0	0	0	0
												0	0	0	ND	0	0	0	0	0	0
												0	0	0	ND	0	0	0	0	0	0
												0	0	0	0	1	1	1	0	0	1
												0	0	0	ND	0	0	0	0	0	0
												0	0	0	ND	0	0	0	0	0	0
												0	0	0	ND	0	0	0	0	0	0
												0	0	0	ND	0	0	0	0	0	0
												0	0	0	ND	0	0	0	1	0	0
												0	0	0	ND	1	0	0	0	0	0
												0	0	0	ND	0	0	1	1	0	0
												0	0	0	ND	0	0	0	0	0	0
												0	0	0	ND	1	0	0	1	0	0
												0	0	0	ND	0	0	0	0	0	1
												0	0	0	ND	0	0	0	1	0	0
												0	0	0	ND	0	0	0	0	0	0
												0	0	0	ND	0	0	0	0	0	0
												0	0	0	ND	0	0	0	0	0	0
												0	0	0	0	0	0	0	0	0	0
												0	0	0	ND	0	0	0	0	0	0
												0	0	0	ND	0	0	0	0	0	0
												0	0	0	0	0	0	0	0	0	0
												0	0	0	1	0	0	0	0	0	0
												0	0	0	ND	0	0	0	0	0	0
												0	0	0	ND	0	0	0	0	0	0
												0	0	0	ND	0	0	0	0	0	1
												0	0	0	ND	0	0	0	0	0	0
												0	0	0	ND	1	0	1	0	0	0
												0	0	0	ND	0	0	0	0	0	0
												0	0	0	ND	0	0	0	0	0	0
												0	0	0	ND	0	0	0	1	0	1
												0	0	0	ND	0	0	0	0	0	0
												0	0	0	ND	0	0	0	0	0	0
												0	0	0	ND	0	0	0	0	0	0
												0	0	0	ND	0	0	0	0	1	1
												0	0	0	ND	1	0	1	0	0	1
												0	0	0	ND	0	0	0	0	0	0
												0	0	0	ND	0	1	1	0	0	0
												0	0	0	ND	0	0	1	0	0	0
												0	0	0	ND	0	0	1	0	0	1
												0	0	0	ND	0	0	0	0	0	0
												0	0	0	ND	0	0	0	0	0	0
												0	0	0	ND	0	0	0	0	0	0
												0	0	0	ND	0	0	0	0	0	0
												0	0	0	ND	0	0	0	0	0	0
												0	0	0	ND	0	0	0	0	0	0
												0	0	0	ND	0	0	0	0	0	0
												0	0	0	ND	0	0	0	0	0	0
												0	0	0	ND	0	1	1	0	1	1
												0	0	0	ND	0	0	0	0	0	0
												0	0	0	ND	0	0	0	1	1	0
												0	0	0	ND	0	0	0	0	0	0
												0	0	0	ND	0	0	0	0	1	1
												0	0	0	ND	0	0	0	0	0	0
												0	0	0	ND	0	0	0	0	0	0
												0	0	0	ND	0	0	0	0	0	0
												0	0	0	ND	0	0	0	0	1	1
												0	0	0	ND	0	0	0	0	0	0
												0	0	0	ND	1	0	1	1	1	1
												0	0	0	ND	0	0	0	0	0	0
												0	0	0	ND	0	0	0	0	0	0
												0	0	0	ND	0	0	0	0	0	1
												0	0	0	ND	0	0	1	0	0	0
												0	0	0	ND	0	0	0	0	0	1
												0	0	0	ND	0	0	0	0	0	0
												0	0	0	ND	0	0	0	0	0	0
												0	0	0	ND	0	0	0	0	0	0
												0	0	0	ND	0	0	0	0	0	0
												0	0	0	ND	0	0	0	0	0	0
												0	0	0	1	0	0	0	0	0	0
												0	0	0	ND	0	0	1	0	1	1
												0	0	0	ND	0	0	0	0	0	0
												0	0	0	ND	0	0	0	0	0	0
												0	0	0	ND	0	0	0	0	0	0
												0	0	0	ND	1	0	0	1	0	0
												0	0	0	ND	0	0	0	0	0	0
												0	0	0	ND	0	1	0	1	0	0
												0	0	0	ND	0	0	1	0	1	1
												0	0	0	ND	0	0	0	0	0	0
												0	0	0	ND	0	0	0	0	0	0
												0	0	0	ND	0	0	1	1	1	0
												0	0	0	ND	0	0	0	0	0	0
												0	0	0	ND	0	0	1	0	1	1
												0	0	0	ND	0	0	0	0	0	0
												0	0	0	ND	0	0	1	0	1	1
												0	0	0	ND	0	0	0	0	0	0
												0	0	0	ND	0	0	0	0	0	0
												0	0	0	ND	1	0	1	1	0	1
												0	0	0	ND	0	0	0	1	0	0
												0	0	0	ND	0	0	0	0	0	0
